# Supplementary material for: Multivariate Analysis Applied to Microwave-Driven Cyanide Polymerization: A Statistical View of a Complex System
Source: MDPI journal article supplement (doi:10.3390/polym15020410), 2023-01-12
Supplement: s1 [file s1]

# **MULTIVARIATE ANALYSIS APPLIED TO THE MICROWAVE-DRIVEN CYANIDE POLYMERIZATION: A STATISTICAL VIEW OF A COMPLEX SYSTEM**

Cristina Pérez-Fernández, Elena González-Toril, Eva Mateo-Martí, Marta Ruiz-Bermejo

## **SUPPLEMENTARY INFORMATION**

**Table S1.** Reaction conditions for the production of NH<sub>4</sub>CN polymers from equimolar solutions of NaCN and NH<sub>4</sub>Cl (1 M) assisted by microwave radiation (MWR), series at 170 °C (green), 190 °C (yellow) and 205 °C (red) , or using conventional thermal heating, series 80 °C (blue). The series at 80 °C was taken as reference from [Ruiz-Bermejo et al. 2019]. All the conversion values,  $\alpha$  (%), are represented in the **Figure 1** of the main text (green lines). Note that the syntheses were carried out by triplicate.

| Experiment | T (°C) | t (min) | $\alpha$ (%) | Experiment | T (°C) | t (min) | $\alpha$ (%) | Experiment | T (°C) | t (min) | $\alpha$ (%) | Experiment | T (°C) | t (min) | $\alpha$ (%) |
|------------|--------|---------|--------------|------------|--------|---------|--------------|------------|--------|---------|--------------|------------|--------|---------|--------------|
| 1          | 170    | 5       | 13           | 22         | 190    | 4       | 21           | 43         | 205    | 2       | 24           | 67         | 80     | 1440    | 35           |
| 2          | 170    | 5       | 17           | 23         | 190    | 4       | 22           | 44         | 205    | 2       | 23           | 68         | 80     | 1440    | 35           |
| 3          | 170    | 5       | 14           | 24         | 190    | 4       | 21           | 45         | 205    | 2       | 22           | 69         | 80     | 1440    | 34           |
| 121        | 170    | 9       | 12           | 88         | 190    | 5       | 17           | 97         | 205    | 5       | 16           | 70         | 80     | 2880    | 38           |
| 122        | 170    | 9       | 15           | 89         | 190    | 5       | 18           | 98         | 205    | 5       | 21           | 71         | 80     | 2880    | 41           |
| 123        | 170    | 9       | 15           | 90         | 190    | 5       | 18           | 99         | 205    | 5       | 20           | 72         | 80     | 2880    | 37           |
| 4          | 170    | 18      | 18           | 118        | 190    | 9       | 18           | 46         | 205    | 9       | 18           | 73         | 80     | 4320    | 37           |
| 5          | 170    | 18      | 19           | 119        | 190    | 9       | 17           | 47         | 205    | 9       | 20           | 74         | 80     | 4320    | 38           |
| 6          | 170    | 18      | 17           | 120        | 190    | 9       | 17           | 48         | 205    | 9       | 19           | 75         | 80     | 4320    | 40           |
| 7          | 170    | 36      | 16           | 25         | 190    | 18      | 15           | 49         | 205    | 18      | 12           | 76         | 80     | 5400    | 41           |
| 8          | 170    | 36      | 10           | 26         | 190    | 18      | 14           | 50         | 205    | 18      | 12           | 77         | 80     | 5400    | 39           |
| 9          | 170    | 36      | 7            | 27         | 190    | 18      | 14           | 51         | 205    | 18      | 13           | 78         | 80     | 5400    | 39           |
| 10         | 170    | 52      | 14           | 28         | 190    | 36      | 12           | 52         | 205    | 36      | 15           | 79         | 80     | 7200    | 39           |
| 11         | 170    | 52      | 14           | 29         | 190    | 36      | 13           | 53         | 205    | 36      | 16           | 80         | 80     | 7200    | 41           |
| 12         | 170    | 52      | 17           | 30         | 190    | 36      | 12           | 54         | 205    | 36      | 17           | 81         | 80     | 7200    | 40           |
| 94         | 170    | 58      | 20           | 31         | 190    | 52      | 16           | 55         | 205    | 52      | 16           | 82         | 80     | 8640    | 38           |
| 95         | 170    | 58      | 21           | 32         | 190    | 52      | 16           | 56         | 205    | 52      | 16           | 83         | 80     | 8640    | 39           |
| 96         | 170    | 58      | 19           | 33         | 190    | 52      | 15           | 57         | 205    | 52      | 17           | 84         | 80     | 8640    | 38           |
| 13         | 170    | 67      | 34           | 124        | 190    | 58      | 17           | 91         | 205    | 58      | 13           | 85         | 80     | 10080   | 40           |
| 14         | 170    | 67      | 39           | 125        | 190    | 58      | 17           | 92         | 205    | 58      | 11           | 86         | 80     | 10080   | 44           |
| 15         | 170    | 67      | 38           | 126        | 190    | 58      | 14           | 93         | 205    | 58      | 11           | 87         | 80     | 10080   | 38           |
| 106        | 170    | 72      | 16           | 34         | 190    | 67      | 12           | 58         | 205    | 67      | 36           |            |        |         |              |
| 107        | 170    | 72      | 19           | 35         | 190    | 67      | 12           | 59         | 205    | 67      | 32           |            |        |         |              |
| 108        | 170    | 72      | 17           | 36         | 190    | 67      | 12           | 60         | 205    | 67      | 36           |            |        |         |              |
| 16         | 170    | 90      | 14           | 115        | 190    | 72      | 15           | 100        | 205    | 72      | 16           |            |        |         |              |
| 17         | 170    | 90      | 19           | 116        | 190    | 72      | 14           | 101        | 205    | 72      | 15           |            |        |         |              |
| 18         | 170    | 90      | 18           | 117        | 190    | 72      | 14           | 102        | 205    | 72      | 17           |            |        |         |              |
| 109        | 170    | 105     | 13           | 37         | 190    | 90      | 10           | 61         | 205    | 90      | 13           |            |        |         |              |
| 110        | 170    | 105     | 13           | 38         | 190    | 90      | 10           | 62         | 205    | 90      | 13           |            |        |         |              |
| 111        | 170    | 105     | 12           | 39         | 190    | 90      | 9            | 63         | 205    | 90      | 13           |            |        |         |              |
| 19         | 170    | 120     | 17           | 112        | 190    | 105     | 17           | 103        | 205    | 105     | 11           |            |        |         |              |
| 20         | 170    | 120     | 18           | 113        | 190    | 105     | 15           | 104        | 205    | 105     | 14           |            |        |         |              |
| 21         | 170    | 120     | 17           | 114        | 190    | 105     | 17           | 105        | 205    | 105     | 10           |            |        |         |              |
|            |        |         |              | 40         | 190    | 120     | 15           | 64         | 205    | 120     | 14           |            |        |         |              |
|            |        |         |              | 41         | 190    | 120     | 14           | 65         | 205    | 120     | 11           |            |        |         |              |
|            |        |         |              | 42         | 190    | 120     | 14           | 66         | 205    | 120     | 11           |            |        |         |              |

**Table S2.** Elemental analysis data and the EOR (%) values for NH<sub>4</sub>CN polymers synthesized using the indicated conditions of temperature and reaction time from equimolar solutions of NaCN and NH<sub>4</sub>Cl (1 M) assisted by microwave radiation (MWR), series at 170 °C (green), 190 °C (yellow) and 205 °C (red) , or using conventional thermal heating, series 80 °C (blue).

| Experiment | T (°C) | t (min) | % C   | % H  | % N   | % O   | C/N molar | C/O molar | C/H molar | N/O molar | EOR (%)  |
|------------|--------|---------|-------|------|-------|-------|-----------|-----------|-----------|-----------|----------|
| 1          | 170    | 5       | 38.64 | 3.68 | 37.45 | 20.24 | 1.20      | 2.55      | 0.88      | 2.11      | 90.23    |
| 2          | 170    | 5       | 38.32 | 3.63 | 38.74 | 19.31 | 1.15      | 2.65      | 0.88      | 2.29      | 83.10    |
| 3          | 170    | 5       | 37.90 | 3.71 | 38.31 | 20.09 | 1.15      | 2.52      | 0.85      | 2.18      | 80.95    |
| 4          | 170    | 18      | 40.81 | 3.58 | 39.89 | 15.73 | 1.19      | 3.46      | 0.95      | 2.90      | 75.86    |
| 5          | 170    | 18      | 40.52 | 3.43 | 39.69 | 16.36 | 1.19      | 3.30      | 0.98      | 2.77      | 83.83    |
| 6          | 170    | 18      | 39.64 | 3.44 | 38.39 | 18.53 | 1.20      | 2.85      | 0.96      | 2.37      | 85.75    |
| 7          | 170    | 36      | 38.95 | 3.58 | 37.10 | 20.38 | 1.22      | 2.55      | 0.91      | 2.08      | 85.95    |
| 8          | 170    | 36      | 38.22 | 3.58 | 35.74 | 22.47 | 1.25      | 2.27      | 0.89      | 1.82      | 87.92    |
| 9          | 170    | 36      | 37.90 | 3.61 | 35.83 | 22.66 | 1.23      | 2.23      | 0.87      | 1.81      | 88.80    |
| 10         | 170    | 52      | 37.97 | 3.57 | 35.92 | 22.55 | 1.23      | 2.25      | 0.89      | 1.82      | 91.31    |
| 11         | 170    | 52      | 35.95 | 3.44 | 34.20 | 26.42 | 1.23      | 1.81      | 0.87      | 1.48      | 90.89    |
| 12         | 170    | 52      | 37.29 | 3.38 | 35.01 | 24.32 | 1.24      | 2.04      | 0.92      | 1.64      | 91.26    |
| 13         | 170    | 67      | 41.08 | 3.45 | 39.37 | 16.11 | 1.22      | 3.40      | 0.99      | 2.79      | 80.18    |
| 14         | 170    | 67      | 41.86 | 3.36 | 40.20 | 14.59 | 1.21      | 3.83      | 1.04      | 3.15      | 83.19    |
| 15         | 170    | 67      | 41.21 | 3.71 | 39.50 | 15.58 | 1.22      | 3.53      | 0.92      | 2.90      | 84.49    |
| 16         | 170    | 90      | 38.77 | 3.49 | 36.16 | 21.58 | 1.25      | 2.40      | 0.93      | 1.92      | 88.63    |
| 17         | 170    | 90      | 39.44 | 3.41 | 36.82 | 20.34 | 1.25      | 2.59      | 0.96      | 2.07      | 87.87    |
| 18         | 170    | 90      | 38.93 | 3.42 | 36.40 | 21.26 | 1.25      | 2.44      | 0.95      | 1.96      | 89.34    |
| 19         | 170    | 120     | 36.60 | 3.34 | 33.71 | 26.36 | 1.27      | 1.85      | 0.91      | 1.46      | 87.62    |
| 20         | 170    | 120     | 38.20 | 3.36 | 35.19 | 23.26 | 1.27      | 2.19      | 0.95      | 1.73      | 89.19    |
| 21         | 170    | 120     | 38.85 | 3.39 | 35.98 | 21.79 | 1.26      | 2.38      | 0.96      | 1.89      | 88.69    |
| 22         | 190    | 4       | 39.16 | 3.40 | 37.68 | 19.76 | 1.21      | 2.64      | 0.96      | 2.18      | 77.79    |
| 23         | 190    | 4       | 40.72 | 3.63 | 39.00 | 16.66 | 1.22      | 3.26      | 0.94      | 2.68      | 81.42    |
| 24         | 190    | 4       | 41.35 | 3.53 | 39.36 | 15.77 | 1.23      | 3.50      | 0.98      | 2.85      | 80.29    |
| 25         | 190    | 18      | 38.76 | 3.27 | 36.90 | 21.09 | 1.23      | 2.45      | 0.99      | 2.00      | 84.28    |
| 26         | 190    | 18      | 37.42 | 3.24 | 35.39 | 23.95 | 1.23      | 2.08      | 0.96      | 1.69      | 85.16    |
| 27         | 190    | 18      | 37.54 | 3.35 | 34.82 | 24.31 | 1.26      | 2.06      | 0.94      | 1.64      | 86.79    |
| 28         | 190    | 36      | 33.52 | 2.78 | 27.88 | 35.82 | 1.40      | 1.25      | 1.00      | 0.89      | 88.11    |
| 29         | 190    | 36      | 35.37 | 3.32 | 33.00 | 28.32 | 1.25      | 1.67      | 0.89      | 1.33      | 88.67    |
| 30         | 190    | 36      | 37.10 | 3.52 | 34.20 | 25.18 | 1.27      | 1.96      | 0.88      | 1.55      | 87.12    |
| 31         | 190    | 52      | 38.88 | 3.60 | 36.42 | 21.11 | 1.25      | 2.46      | 0.90      | 1.97      | 87.15    |
| 32         | 190    | 52      | 39.13 | 3.43 | 35.74 | 21.70 | 1.28      | 2.40      | 0.95      | 1.88      | 88.78    |
| 33         | 190    | 52      | 38.59 | 3.45 | 34.31 | 23.65 | 1.31      | 2.18      | 0.93      | 1.66      | 86.25    |
| 34         | 190    | 67      | 40.62 | 3.48 | 37.45 | 18.46 | 1.27      | 2.93      | 0.97      | 2.32      | 86.01    |
| 35         | 190    | 67      | 41.50 | 3.48 | 38.50 | 16.53 | 1.26      | 3.35      | 0.99      | 2.66      | 85.78    |
| 36         | 190    | 67      | 40.87 | 3.56 | 37.49 | 18.10 | 1.27      | 3.01      | 0.96      | 2.37      | 83.62    |
| 37         | 190    | 90      | 38.77 | 3.42 | 35.39 | 22.43 | 1.28      | 2.30      | 0.95      | 1.80      | 85.95    |
| 38         | 190    | 90      | 38.08 | 3.37 | 34.30 | 24.25 | 1.30      | 2.09      | 0.94      | 1.62      | 87.92    |
| 39         | 190    | 90      | 39.53 | 3.29 | 35.15 | 22.03 | 1.31      | 2.39      | 1.00      | 1.82      | 88.80    |
| 40         | 190    | 120     | 39.89 | 3.32 | 34.73 | 22.06 | 1.34      | 2.41      | 1.00      | 1.80      | 88.63    |
| 41         | 190    | 120     | 38.91 | 3.42 | 34.97 | 22.70 | 1.30      | 2.29      | 0.95      | 1.76      | 87.82    |
| 42         | 190    | 120     | 39.47 | 3.40 | 35.53 | 21.60 | 1.30      | 2.44      | 0.97      | 1.88      | 89.29    |
| 43         | 205    | 2       | 41.62 | 3.58 | 38.96 | 15.86 | 1.25      | 3.50      | 0.97      | 2.81      | 82.64    |
| 44         | 205    | 2       | 41.34 | 3.52 | 38.73 | 16.42 | 1.25      | 3.36      | 0.98      | 2.70      | 80.16    |
| 45         | 205    | 2       | 40.47 | 3.66 | 38.13 | 17.75 | 1.24      | 3.04      | 0.92      | 2.45      | 80.73    |
| 46         | 205    | 9       | 39.31 | 3.38 | 36.07 | 21.23 | 1.27      | 2.47      | 0.97      | 1.94      | 84.82    |
| 47         | 205    | 9       | 38.74 | 3.50 | 35.44 | 22.33 | 1.28      | 2.31      | 0.92      | 1.81      | 86.29    |
| 48         | 205    | 9       | 38.79 | 3.49 | 35.75 | 21.96 | 1.27      | 2.36      | 0.93      | 1.86      | 87.85    |
| 49         | 205    | 18      | 40.67 | 3.63 | 38.25 | 17.46 | 1.24      | 3.11      | 0.93      | 2.50      | 88.64    |
| 50         | 205    | 18      | 39.13 | 3.57 | 35.24 | 22.07 | 1.30      | 2.36      | 0.91      | 1.82      | 87.29    |
| 51         | 205    | 18      | 39.93 | 3.58 | 36.26 | 20.24 | 1.28      | 2.63      | 0.93      | 2.05      | 86.23    |
| 52         | 205    | 36      | 38.39 | 3.81 | 35.47 | 22.33 | 1.26      | 2.29      | 0.84      | 1.82      | 86.48    |
| 53         | 205    | 36      | 40.11 | 3.61 | 36.66 | 19.63 | 1.28      | 2.73      | 0.93      | 2.13      | 88.46    |
| 54         | 205    | 36      | 40.98 | 3.72 | 37.58 | 17.73 | 1.27      | 3.08      | 0.92      | 2.42      | 87.91    |
| 55         | 205    | 52      | 41.03 | 3.69 | 36.86 | 18.43 | 1.30      | 2.97      | 0.93      | 2.29      | 89.04    |
| 56         | 205    | 52      | 41.00 | 3.67 | 37.16 | 18.18 | 1.29      | 3.01      | 0.93      | 2.34      | 88.36    |
| 57         | 205    | 52      | 40.98 | 3.67 | 37.01 | 18.34 | 1.29      | 2.98      | 0.93      | 2.31      | 88.41    |
| 58         | 205    | 67      | 41.37 | 3.49 | 37.02 | 18.12 | 1.30      | 3.04      | 0.99      | 2.34      | 86.82    |
| 59         | 205    | 67      | 41.94 | 3.42 | 37.38 | 17.25 | 1.31      | 3.24      | 1.02      | 2.48      | 85.26    |
| 60         | 205    | 67      | 41.64 | 3.49 | 37.13 | 17.74 | 1.31      | 3.13      | 0.99      | 2.39      | 88.32    |
| 61         | 205    | 90      | 38.12 | 3.57 | 33.58 | 24.74 | 1.32      | 2.05      | 0.89      | 1.55      | 90.42    |
| 62         | 205    | 90      | 40.34 | 3.51 | 35.88 | 20.27 | 1.31      | 2.65      | 0.96      | 2.02      | 89.62    |
| 63         | 205    | 90      | 40.19 | 3.61 | 35.92 | 19.92 | 1.31      | 2.69      | 0.93      | 2.06      | 90.23    |
| 64         | 205    | 120     | 40.21 | 3.60 | 34.80 | 21.40 | 1.35      | 2.51      | 0.93      | 1.86      | 90.74    |
| 65         | 205    | 120     | 39.04 | 3.51 | 34.32 | 23.13 | 1.33      | 2.25      | 0.93      | 1.70      | 89.53    |
| 66         | 205    | 120     | 36.69 | 3.47 | 32.31 | 27.53 | 1.32      | 1.78      | 0.88      | 1.34      | 84.78    |
| 67         | 80     | 1440    | 39.07 | 3.54 | 38.98 | 18.42 | 1.17      | 3.06      | 0.92      | 2.62      | 90.08108 |
| 68         | 80     | 1440    | 38.76 | 3.44 | 38.73 | 19.08 | 1.17      | 3.04      | 0.94      | 2.60      | 87.73953 |
| 69         | 80     | 1440    | 38.56 | 3.73 | 38.31 | 19.40 | 1.17      | 3.02      | 0.86      | 2.57      | 89.45956 |
| 70         | 80     | 2880    | 38.05 | 3.62 | 37.46 | 20.87 | 1.19      | 2.98      | 0.88      | 2.52      | 89.57363 |
| 71         | 80     | 2880    | 38.91 | 3.77 | 38.54 | 18.79 | 1.18      | 3.05      | 0.86      | 2.59      | 88.1912  |
| 72         | 80     | 2880    | 38.09 | 3.75 | 37.56 | 20.61 | 1.18      | 2.99      | 0.85      | 2.52      | 87.57391 |
| 73         | 80     | 4320    | 38.32 | 3.53 | 37.47 | 20.69 | 1.19      | 3.00      | 0.90      | 2.52      | 85.68319 |
| 74         | 80     | 4320    | 38.05 | 3.76 | 36.99 | 21.21 | 1.20      | 2.98      | 0.84      | 2.48      | 89.50949 |
| 75         | 80     | 4320    | 38.88 | 3.55 | 38.10 | 19.48 | 1.19      | 3.05      | 0.91      | 2.56      | 90.51412 |
| 76         | 80     | 5400    | 39.22 | 3.53 | 38.00 | 19.26 | 1.20      | 3.07      | 0.93      | 2.55      | 91.18264 |
| 77         | 80     | 5400    | 38.80 | 3.42 | 37.87 | 19.92 | 1.20      | 3.04      | 0.95      | 2.54      | 87.2176  |
| 78         | 80     | 5400    | 39.58 | 3.56 | 38.24 | 18.63 | 1.21      | 3.10      | 0.93      | 2.57      | 88.95688 |
| 79         | 80     | 7200    | 39.75 | 3.63 | 38.22 | 18.41 | 1.21      | 3.12      | 0.91      | 2.57      | 89.92806 |
| 80         | 80     | 7200    | 40.24 | 3.84 | 38.70 | 17.23 | 1.21      | 3.15      | 0.87      | 2.60      | 90.28931 |
| 81         | 80     | 7200    | 39.88 | 3.43 | 38.42 | 18.28 | 1.21      | 3.13      | 0.97      | 2.58      | 89.70192 |
| 82         | 80     | 8640    | 41.61 | 3.62 | 40.70 | 14.08 | 1.19      | 3.26      | 0.96      | 2.73      | 87.34969 |
| 83         | 80     | 8640    | 41.07 | 3.90 | 39.59 | 15.45 | 1.21      | 3.22      | 0.88      | 2.66      | 89.05151 |
| 84         | 80     | 8640    | 41.90 | 4.01 | 40.54 | 13.57 | 1.21      | 3.28      | 0.87      | 2.72      | 89.42187 |
| 85         | 80     | 10080   | 41.47 | 3.64 | 40.26 | 14.65 | 1.20      | 3.25      | 0.95      | 2.70      | 89.95808 |
| 86         | 80     | 10080   | 41.67 | 4.04 | 40.41 | 13.89 | 1.20      | 3.27      | 0.86      | 2.72      | 90.04966 |
| 87         | 80     | 10080   | 41.03 | 3.73 | 39.70 | 15.55 | 1.21      | 3.22      | 0.92      | 2.67      | 85.52521 |

**Table S3.** CATPCA correlation matrix and eigenvalues (Figure 4). High positive values between two variables indicate that they are directly proportional. High negative values indicate that they are inversely proportional.

| Correlations Original Variables |        |         |              |        |          |          |        |           |           |           |           |         |
|---------------------------------|--------|---------|--------------|--------|----------|----------|--------|-----------|-----------|-----------|-----------|---------|
|                                 | T (°C) | t (min) | $\alpha$ (%) | Carbon | Hydrogen | Nitrogen | Oxygen | C/N molar | C/O molar | C/H molar | N/O molar | EOR (%) |
| T (°C)                          | 1.000  | -0.066  | 0.015        | 0.303  | 0.211    | -0.180   | -0.022 | 0.617     | 0.074     | 0.130     | -0.016    | 0.052   |
| t (min)                         | -0.066 | 1.000   | -0.186       | -0.048 | -0.300   | -0.424   | 0.294  | 0.561     | -0.289    | 0.107     | -0.324    | 0.503   |
| $\alpha$ (%)                    | 0.015  | -0.186  | 1.000        | 0.564  | 0.093    | 0.588    | -0.659 | -0.244    | 0.669     | 0.438     | 0.675     | -0.456  |
| Carbon                          | 0.303  | -0.048  | 0.564        | 1.000  | 0.426    | 0.731    | -0.864 | 0.007     | 0.880     | 0.521     | 0.844     | -0.319  |
| Hydrogen                        | 0.211  | -0.300  | 0.093        | 0.426  | 1.000    | 0.424    | -0.399 | -0.213    | 0.446     | -0.475    | 0.414     | -0.103  |
| Nitrogen                        | -0.180 | -0.424  | 0.588        | 0.731  | 0.424    | 1.000    | -0.927 | -0.599    | 0.896     | 0.339     | 0.929     | -0.567  |
| Oxygen                          | -0.022 | 0.294   | -0.659       | -0.864 | -0.399   | -0.927   | 1.000  | 0.395     | -0.945    | -0.478    | -0.960    | 0.522   |
| C/N molar                       | 0.617  | 0.561   | -0.244       | 0.007  | -0.213   | -0.599   | 0.395  | 1.000     | -0.335    | 0.183     | -0.444    | 0.526   |
| C/O molar                       | 0.074  | -0.289  | 0.669        | 0.880  | 0.446    | 0.896    | -0.945 | -0.335    | 1.000     | 0.436     | 0.964     | -0.520  |
| C/H molar                       | 0.130  | 0.107   | 0.438        | 0.521  | -0.475   | 0.339    | -0.478 | 0.183     | 0.436     | 1.000     | 0.437     | -0.263  |
| N/O molar                       | -0.016 | -0.324  | 0.675        | 0.844  | 0.414    | 0.929    | -0.960 | -0.444    | 0.964     | 0.437     | 1.000     | -0.565  |
| EOR (%)                         | 0.052  | 0.503   | -0.456       | -0.319 | -0.103   | -0.567   | 0.522  | 0.526     | -0.520    | -0.263    | -0.565    | 1.000   |
| Dimension                       | 1      | 2       | 3            | 4      | 5        | 6        | 7      | 8         | 9         | 10        | 11        | 12      |
| Eigenvalue                      | 6.110  | 2.146   | 1.565        | 1.007  | 0.476    | 0.386    | 0.103  | 0.065     | 0.047     | 0.039     | 0.033     | 0.024   |

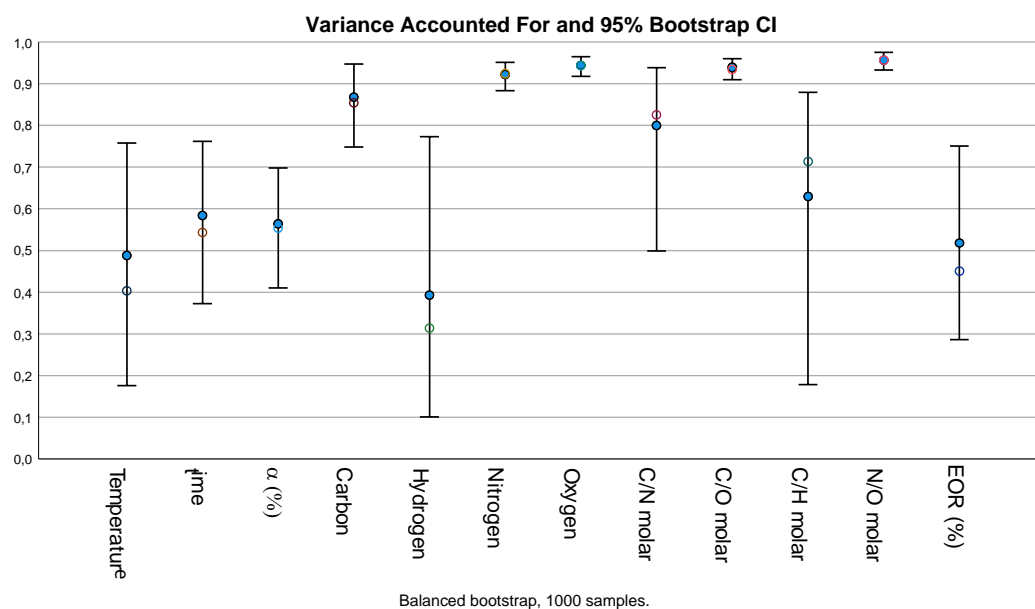

**Figure S1.** Variance accounted for by each question. Estimates and bootstrap 95% confidence intervals (CI) of variance on two categorical variables (temperature and time) and each spectroscopy characteristic. Temperature, hydrogen and molar C/H variations were significantly higher than the rest, while nitrogen, oxygen, molar C/O and N/O were the lowest.

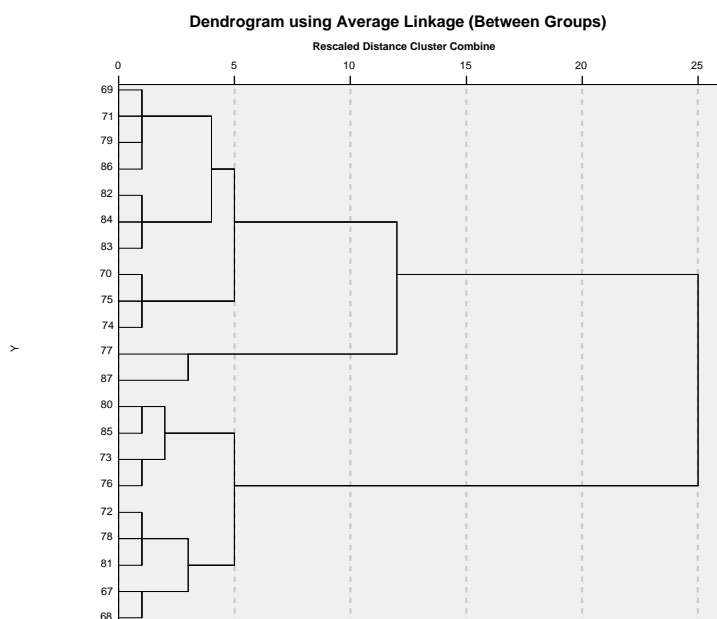

**Figure S2.** Hierarchical dendrogram based in principal component analysis of FT-IR sectors normalized (Series 80 °C). To clarify PCA results (3.1.2.), coefficient scores obtained by PCA analyses were arranged in a hierarchical dendrogram. The numeration of the experiments correspond with the Table S1.

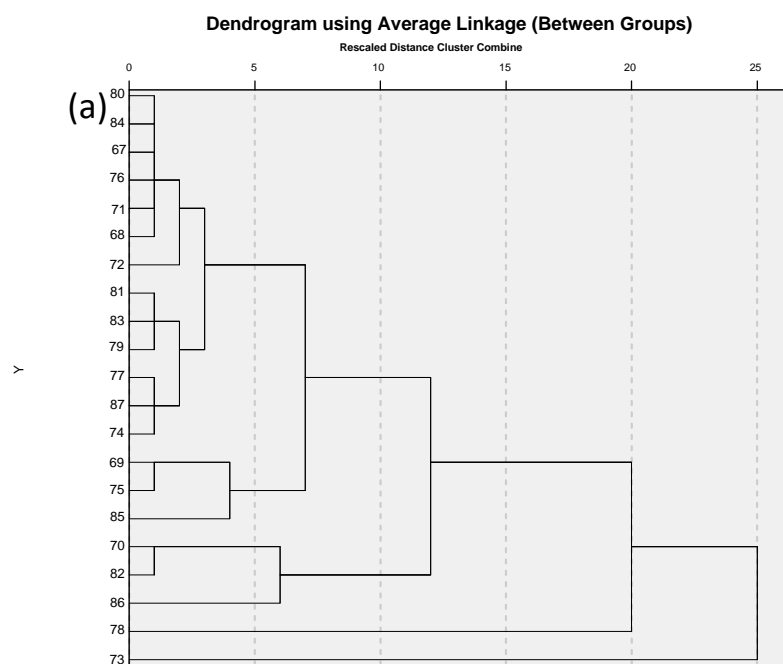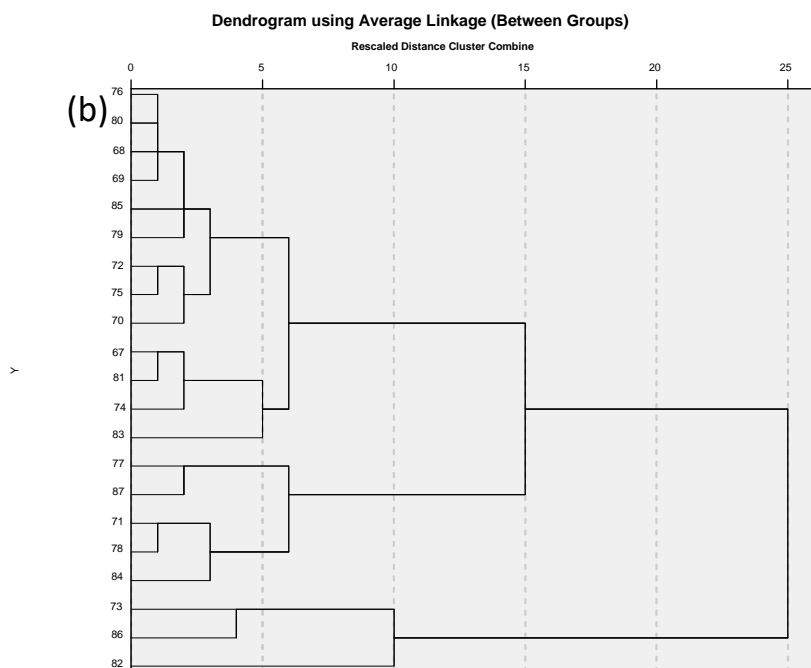

**Figure S3.** Hierarchical dendrogram based in principal component analysis of 2nd derivate FT-IR spectra (4000-450  $\text{cm}^{-1}$ ) (Series 80 °C). To clarify PCA results (3.1.2.), coefficient scores obtained by PCA analyses were arranged in a hierarchical dendrogram. (a) considering 13 smooth points. (b) considering 20 smooth points. The numeration of the experiments correspond with the Table S1.

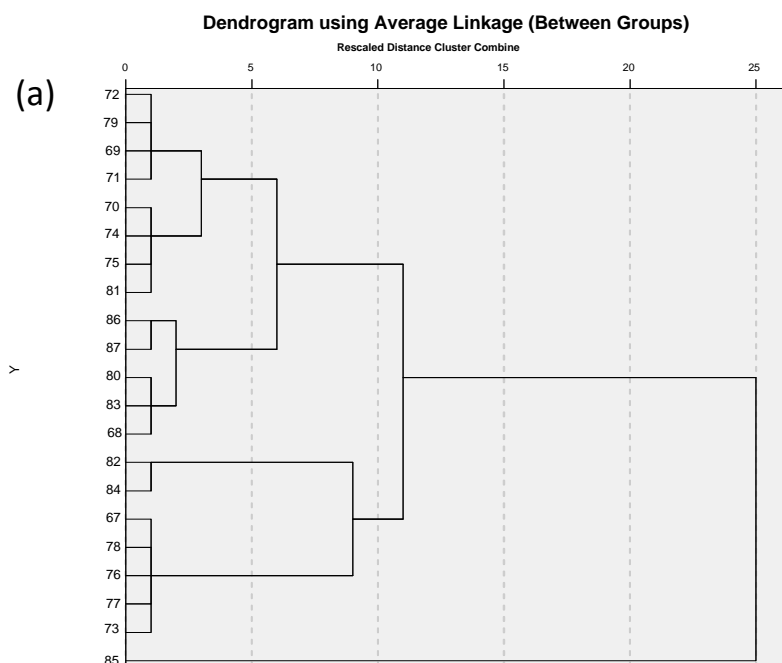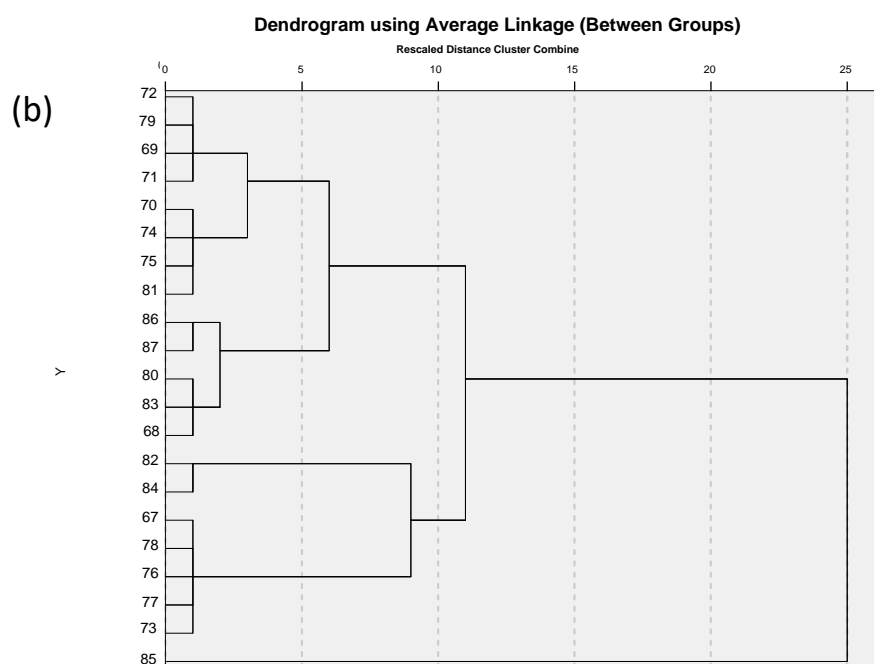

**Figure S4.** Hierarchical dendrogram based in principal component analysis of 2nd derivate FT-IR spectral region from 2300 to 2100  $\text{cm}^{-1}$  (Series 80  $^{\circ}\text{C}$ ). To clarify PCA results (3.1.2.), coefficient scores obtained by PCA analyses were arranged in a hierarchical dendrogram. **(a)** considering 13 smooth points. **(b)** considering 20 smooth points. The numeration of the experiments correspond with the Table S1.



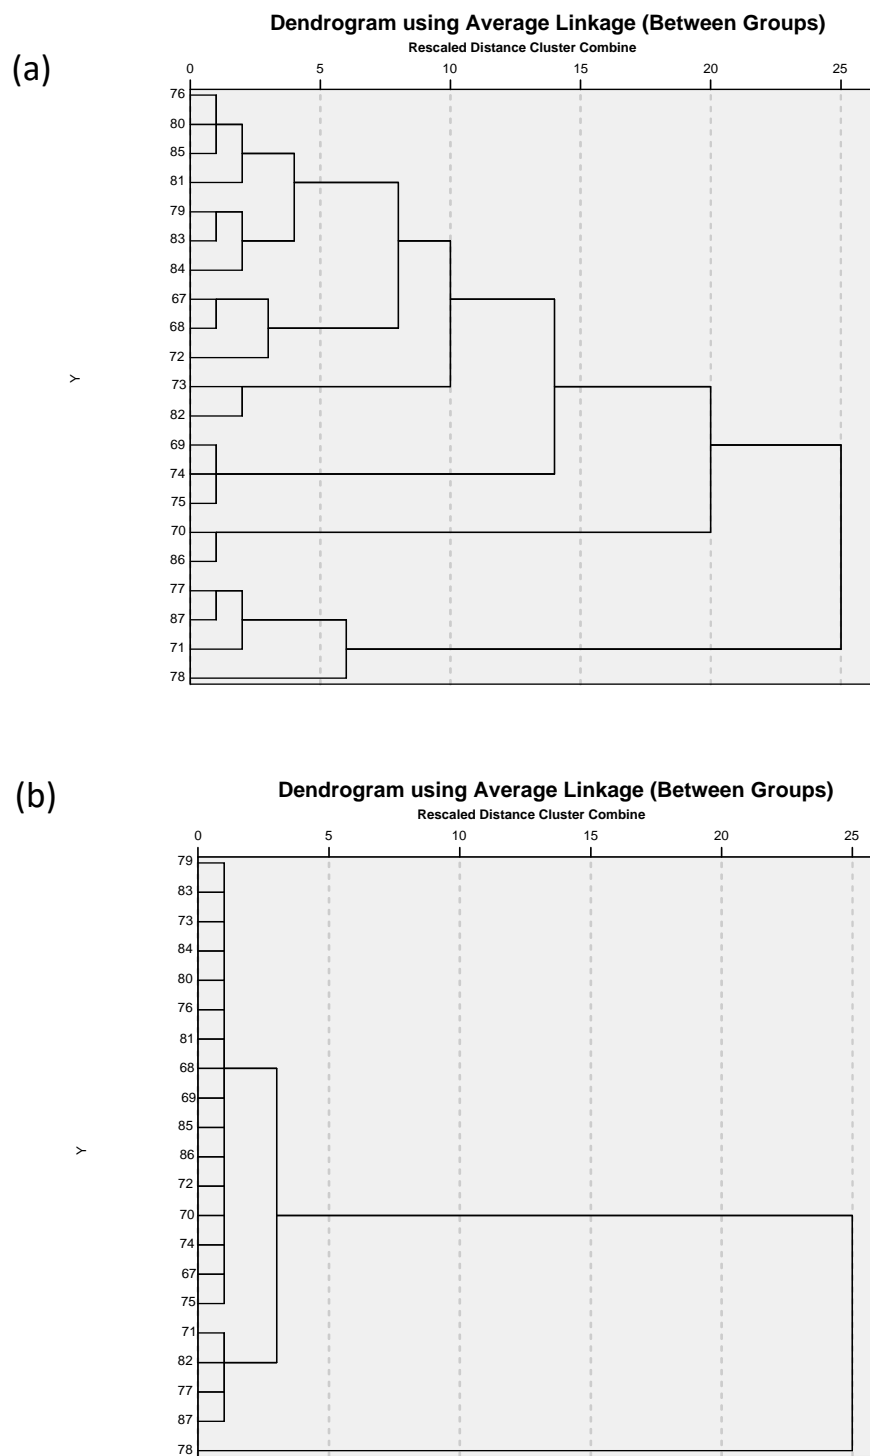

**Figure S5.** Hierarchical dendrogram based in principal component analysis of 2nd derivate FT-IR spectral región from 1820 to 950  $\text{cm}^{-1}$  (Series 80  $^{\circ}\text{C}$ ). To clarify PCA results (3.1.2.), coefficient scores obtained by PCA analyses were arranged in a hierarchical dendrogram. **(a)** considering 13 smooth points. **(b)** considering 20 smooth points. The numeration of the experiments correspond with the Table S1.

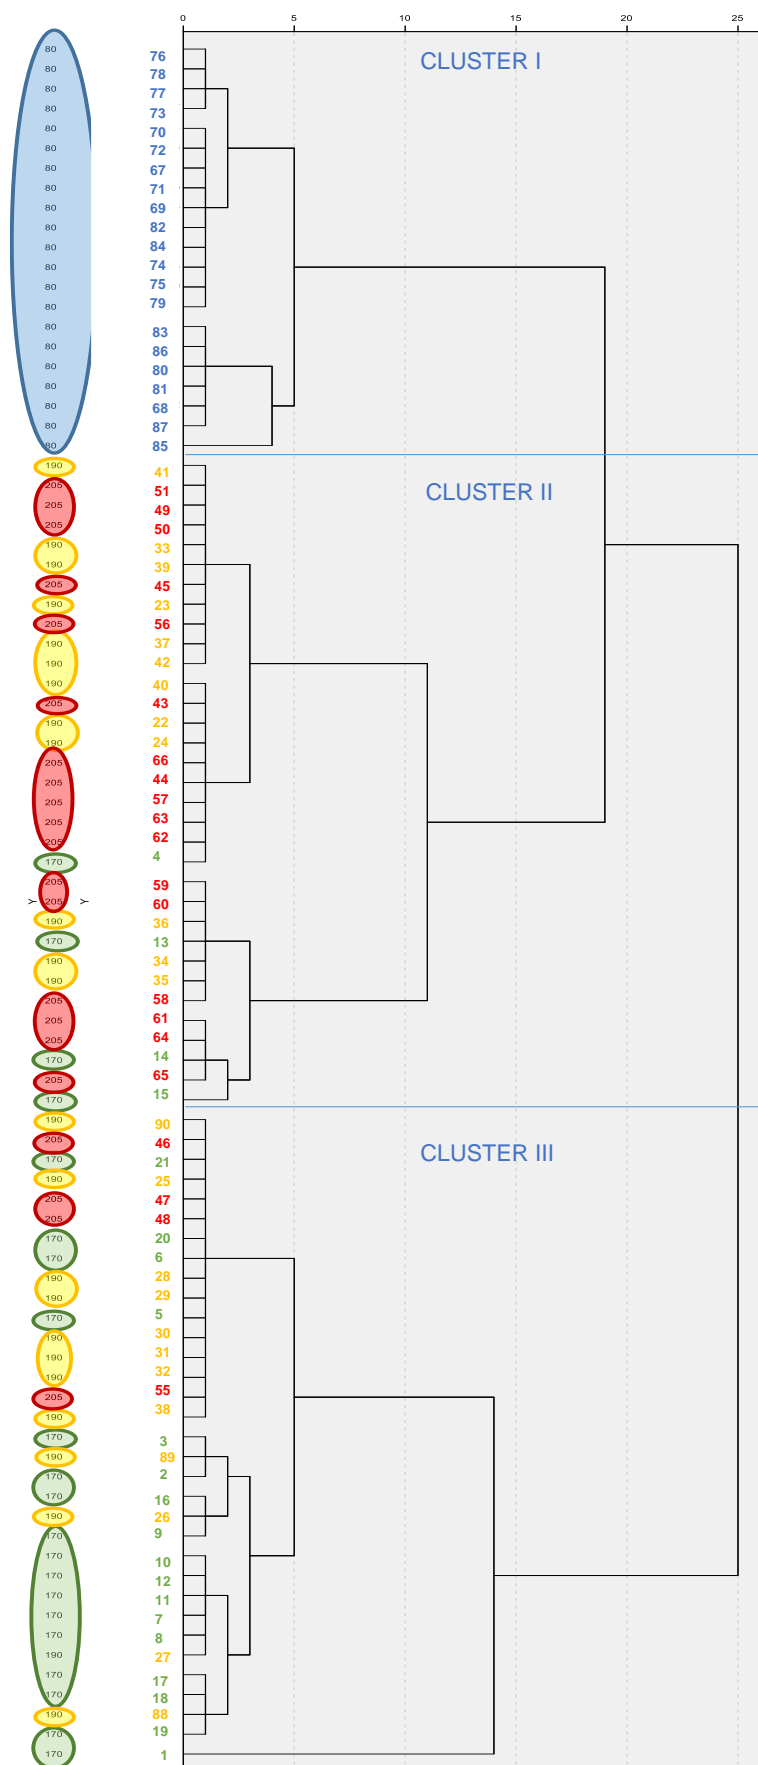

**Figure S6.** Hierarchical dendrogram based in principal component analysis of the 2nd derivate of the FTIR spectral region from 2300 to 2100  $\text{cm}^{-1}$ . To clarify PCA results (3.1.2. and Figure 6e), coefficient scores obtained by PCA analyses were arranged in a hierarchical dendrogram. Similar to Figure 6e, a homogeneous cluster can be observed composed by 80°C series (cluster I). Rest of the experiments are distributed in two clusters, one of them presents most of the 205 °C experiments (cluster II), similarity to Figure 6e. Colored ellipses are used to indicate the experimental series: green represented samples from the 170 °C series, yellow 190 °C series, red 205 °C series and blue 80 °C series. The numeration of the experiments correspond with the Table S1. The samples in boxes are samples synthesized using equivalent reactions time based on the specifications of the microwave manufacture.

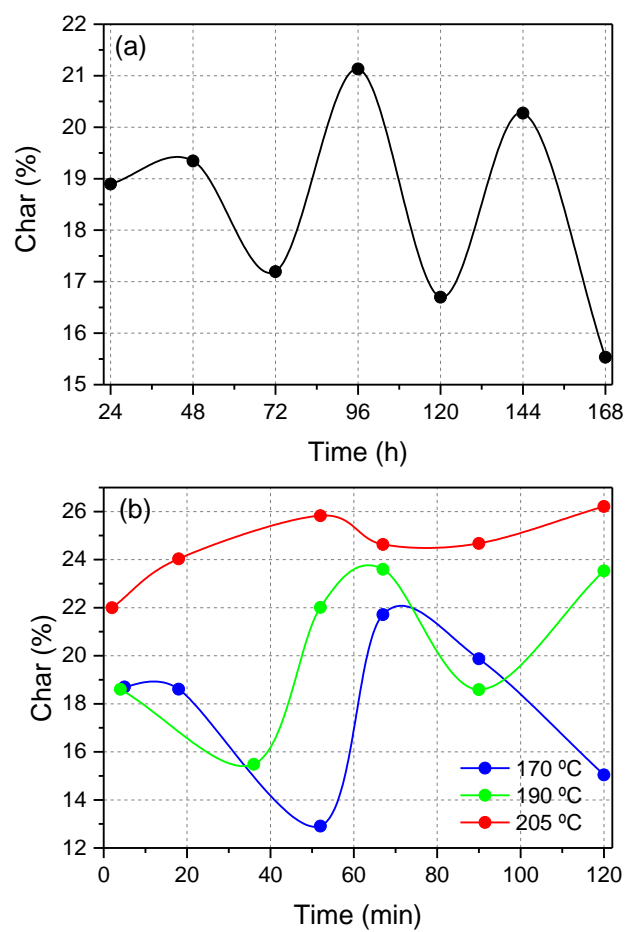

**Figure S7.** Evolution of the char (%) after heating of the samples at 1000 °C as function of the reaction time. (a) 80 °C series; (b) MWR series.

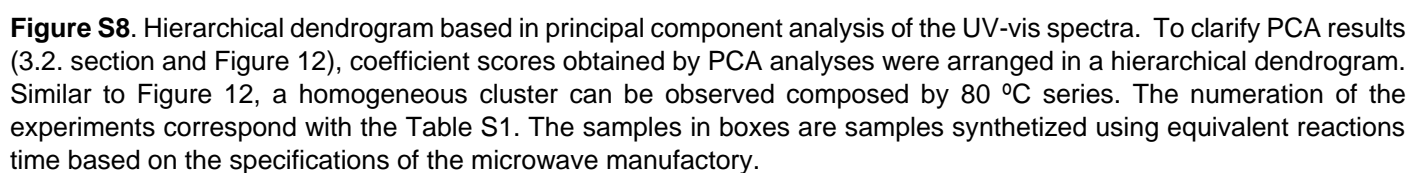

## REFERENCES

Fernández, A.; Ruiz-Bermejo, M.; de la Fuente, J. L. Modelling the kinetic and structural properties evolution of a versatile reaction: The aqueous HCN polymerization. *Phys. Chem. Chem. Phys.* **2018**, *20*, 17353-17366.

Mas, I.; de la Fuente, José L.; Ruiz-Bermejo, M. Temperature effect on aqueous  $\text{NH}_4\text{CN}$  polymerization: Relationship between kinetic behaviour and structural properties. *Eur. Polym. J.* **2020**, *132*, 109719.

Ruiz-Bermejo, M.; de la Fuente, J. L.; Carretero-González, J.; Luis García-Fernández, L.; Aguilar, M. R. A comparative study of HCN polymers synthesized from  $\text{NH}_4\text{CN}$  or DAMN polymerization in aqueous media: New perspectives for prebiotic chemistry and material science. *Chem. Eur. J.* **2019**, *25*, 11437-11455.
